# Supplementary material
Source: PubMed Central journal article supplement (PMC4191106)
Supplement: rsif20140736supp1.pdf [file rsif20140736supp1.pdf]

Supplementary information for

**Cryptic iridescence in a fossil weevil generated by single diamond photonic crystals**

Maria E. McNamara<sup>1,2\*</sup>, Vinod Saranathan<sup>3\*</sup>, Emma Locatelli<sup>1</sup>, Heeso Noh<sup>4,5</sup>, Derek E.G.

Briggs<sup>1,6</sup>, Patrick J. Orr<sup>2</sup> and Hui Cao<sup>5</sup>

<sup>1</sup>Dept. of Geology & Geophysics, Yale University, Kline Geology Laboratory, 210 Whitney Avenue, New Haven  
CT 06520, USA

<sup>2</sup>UCD School of Geological Sciences, University College Dublin, Belfield, Dublin 4, Ireland

<sup>3</sup>Edward Grey Institute, Dept. of Zoology, University of Oxford, Tinbergen Building, South Parks Road, Oxford  
OX1 3PS, UK

<sup>4</sup>Dept. of Nano and Electronic Physics, Kookmin University, 77 Jeong-neong Ro, Seongbuk-gu, Seoul, Korea

<sup>5</sup>Dept. of Applied Physics, Yale University, Becton Centre, 15 Prospect St., New Haven CT 06520, USA

<sup>6</sup>Yale Peabody Museum of Natural History, 170 Whitney Avenue, New Haven, CT 06520, USA

\* Authors for correspondence ([maria.mcnamara@ucc.ie](mailto:maria.mcnamara@ucc.ie), [vinodkumar.saranathan@aya.yale.edu](mailto:vinodkumar.saranathan@aya.yale.edu)). Current address:  
MM: School of Biological, Earth and Environmental Sciences, University College Cork, Cork, Ireland; VS:  
Division of Physics and Applied Physics, School of Physical and Mathematical Sciences, Nanyang Technological  
University, Singapore.

Supplementary Figures S1-S3

Supplementary Tables S1, S2

Supplementary references

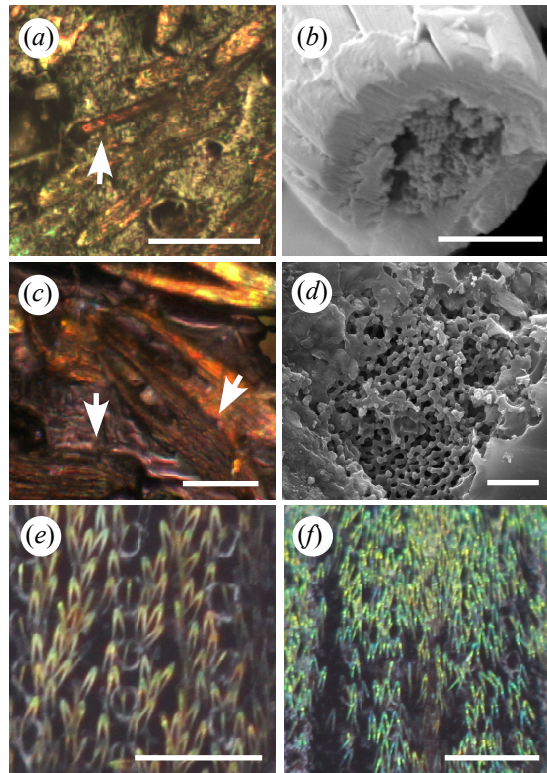

Figure S1. Details of scales in fossil and extant *Hypera*. (a, b) Light (a) and scanning electron (b) micrographs of iridescent seta (arrow) in fossil *H. diversipunctata*. Note multiple domains in (a) and three-dimensional nanostructure in the seta lumen (b). (c, d) Light (c) and scanning electron (d) micrographs of poorly preserved scales in fossil *H. diversipunctata*. Note partially ordered to disordered nanostructure in (c). (e, f) Iridescent scales in extant *H. meles* and *H. nigrirostris* (images courtesy M. Morris). Scale bars: a, 25  $\mu\text{m}$ ; b, d, 2  $\mu\text{m}$ ; c, 10  $\mu\text{m}$ ; e, f, 100  $\mu\text{m}$ .

Figure S2 (overleaf). 2D Small Angle X-ray Scattering (SAXS) analyses of *H. diversipunctata* scales. Left-hand column: SAXS patterns (unmasked; original images 1340 x 1300 pixels). The false colour scale corresponds to the logarithm of scattering intensity. The concentric white circles denote the expected locations of the scattering peaks for single diamond (Fd-3m) structures. Central column: Structural diagnoses of normalised, azimuthally-averaged SAXS profiles integrated from the 2D SAXS patterns. Vertical lines denote expected Bragg peak positional ratios for various cubic crystallographic space groups. Numbers above the vertical lines are squares of the moduli of the Miller indices (hkl) for the allowed reflections of the cubic space-groups. The normalised positional ratios of the scattering peaks are indexed to the predictions of specific crystallographic space groups or symmetries following IUCr conventions. Right-hand column: Indexing of the azimuthally averaged profiles of the respective 2D SAXS patterns of *H. diversipunctata* photonic scales, using the plot of the moduli of the hkl Miller indices of the Bragg peaks against the corresponding reciprocal lattice spacing, S. The observed peaks (solid black circles) are shown alongside the theoretically allowed reflections for the single diamond (Fd-3m) and face centred cubic (F4-3m) crystallographic space group symmetries. The linearity and zero intercepts of the plot confirm the cubic aspect of the nanostructures, and the slope gives an estimate of the lattice parameter, a.

(a) *Hypera diversipunctata* fossil

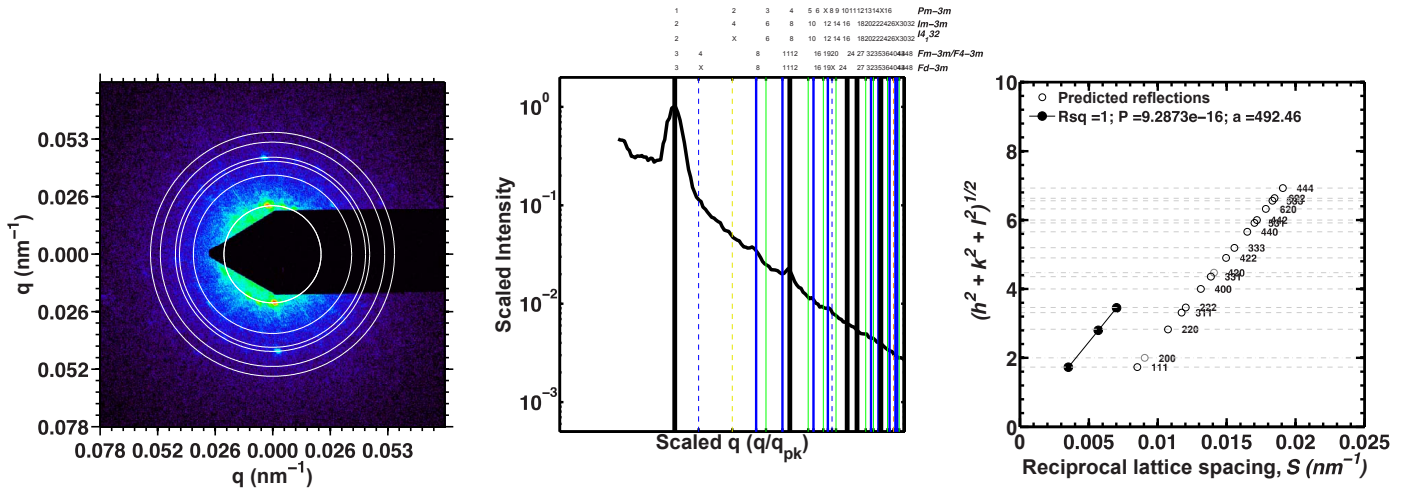

(b) *Hypera diversipunctata* fossil

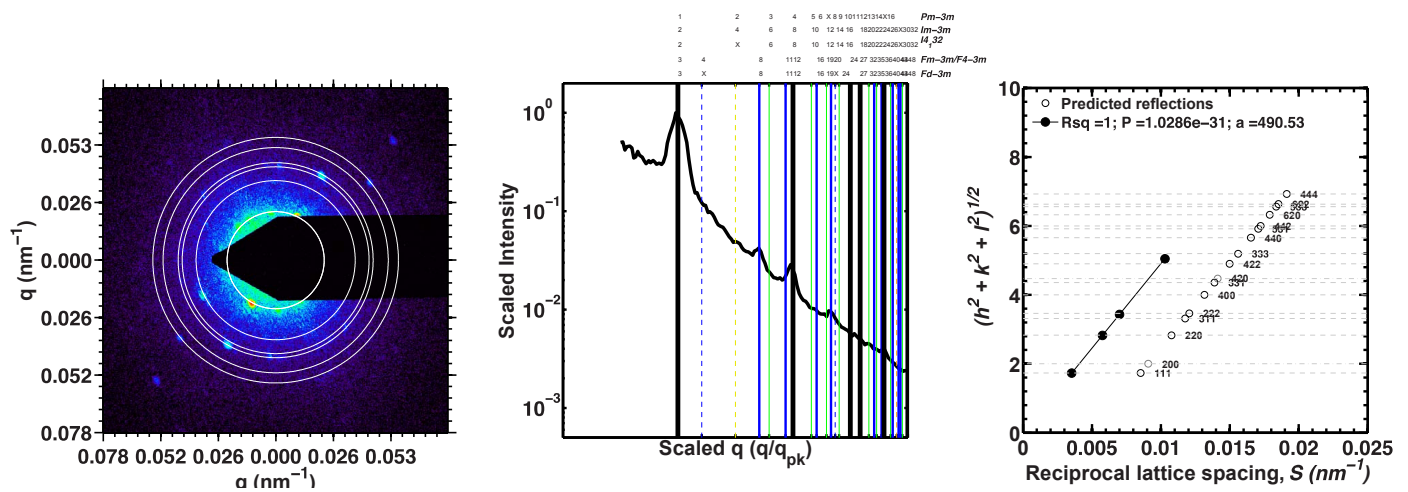

(c) *Hypera diversipunctata* fossil

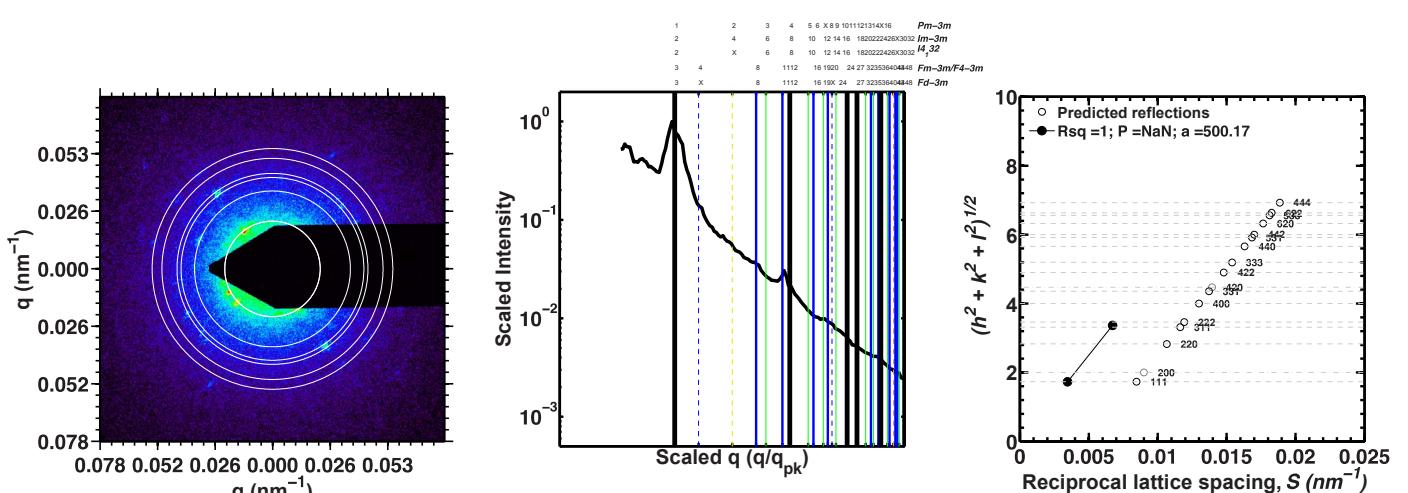







(j) *Hypera diversipunctata* extant

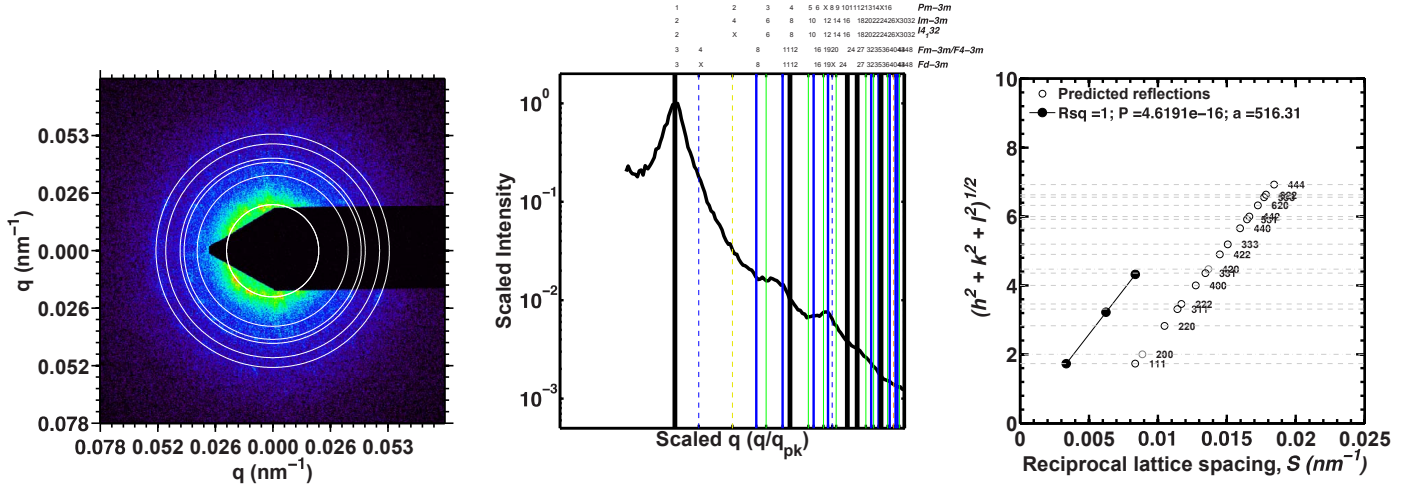

(k) *Hypera diversipunctata* extant

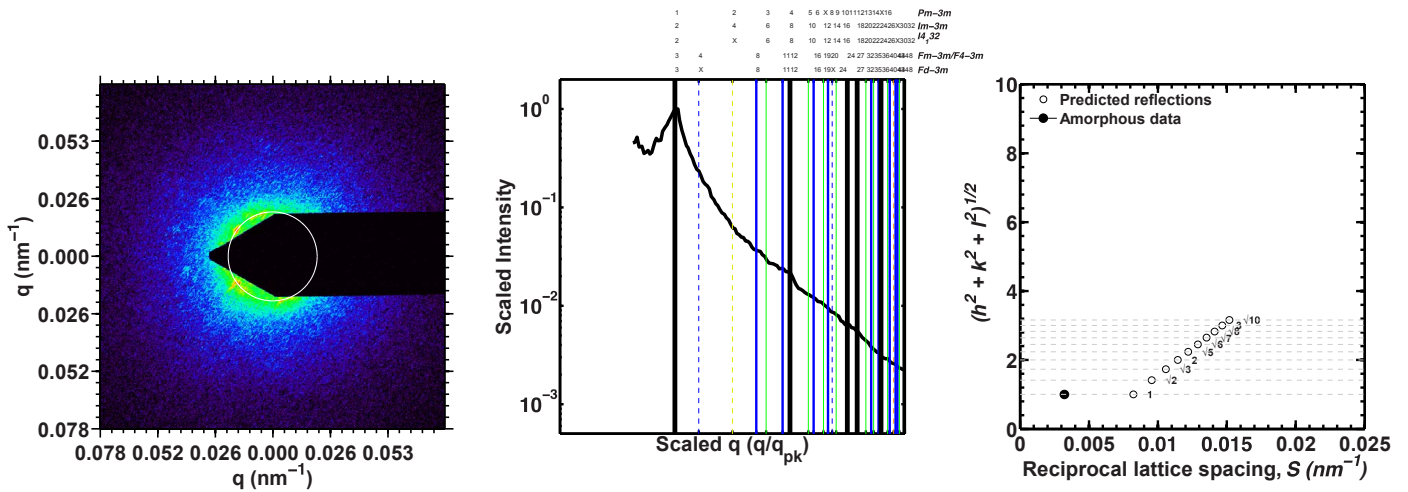

(l) *Hypera diversipunctata* extant

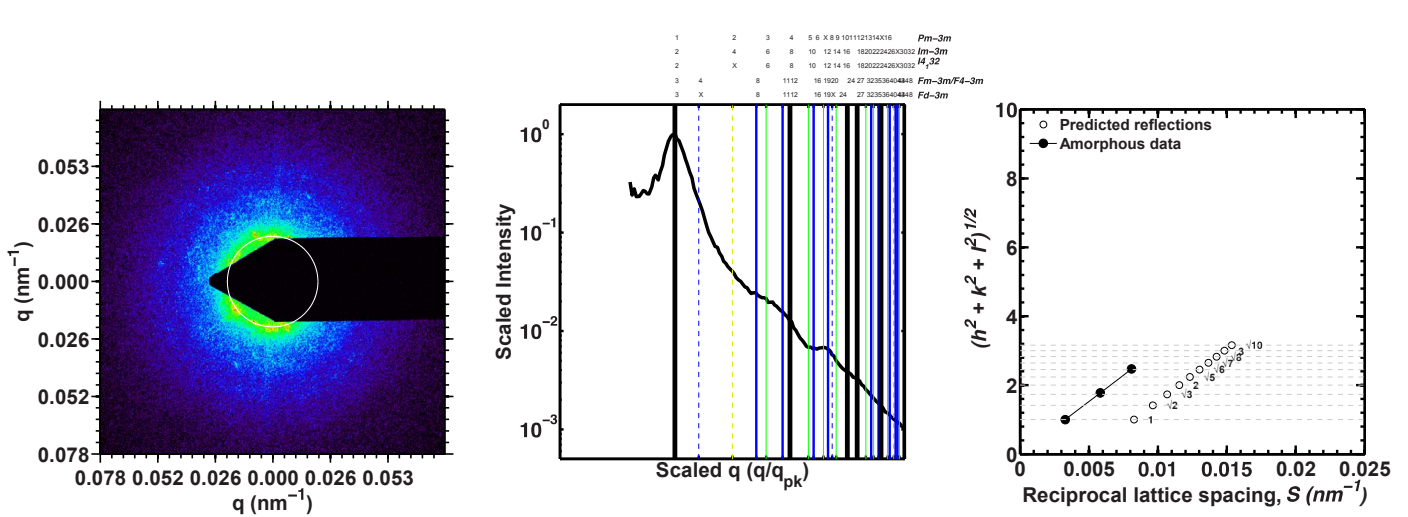





(p) *Hypera diversipunctata* extant

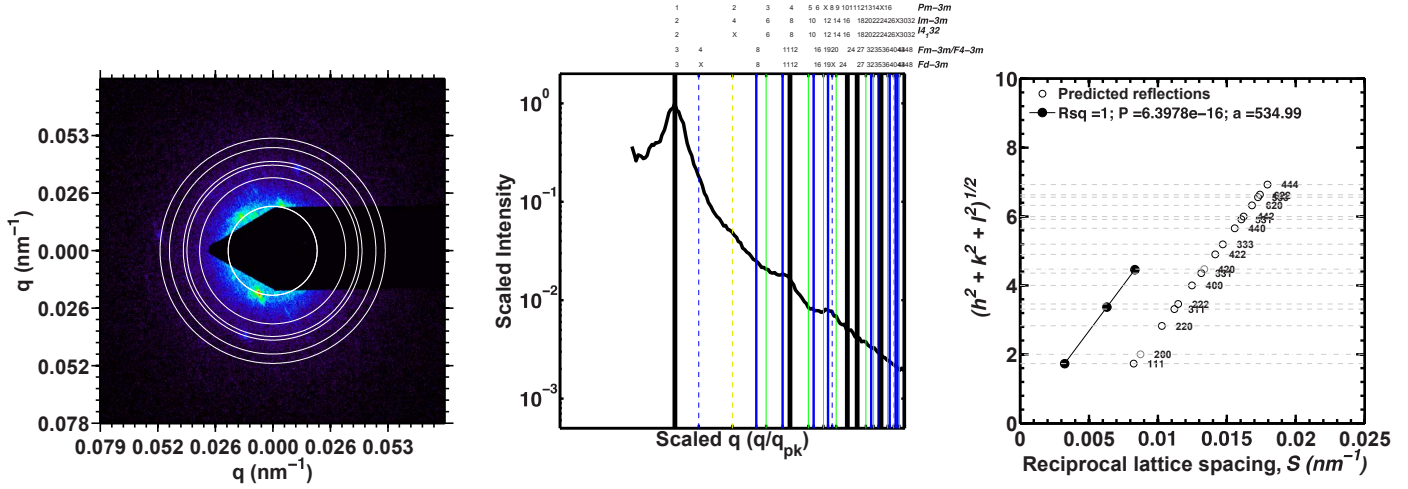

(q) *Hypera diversipunctata* extant

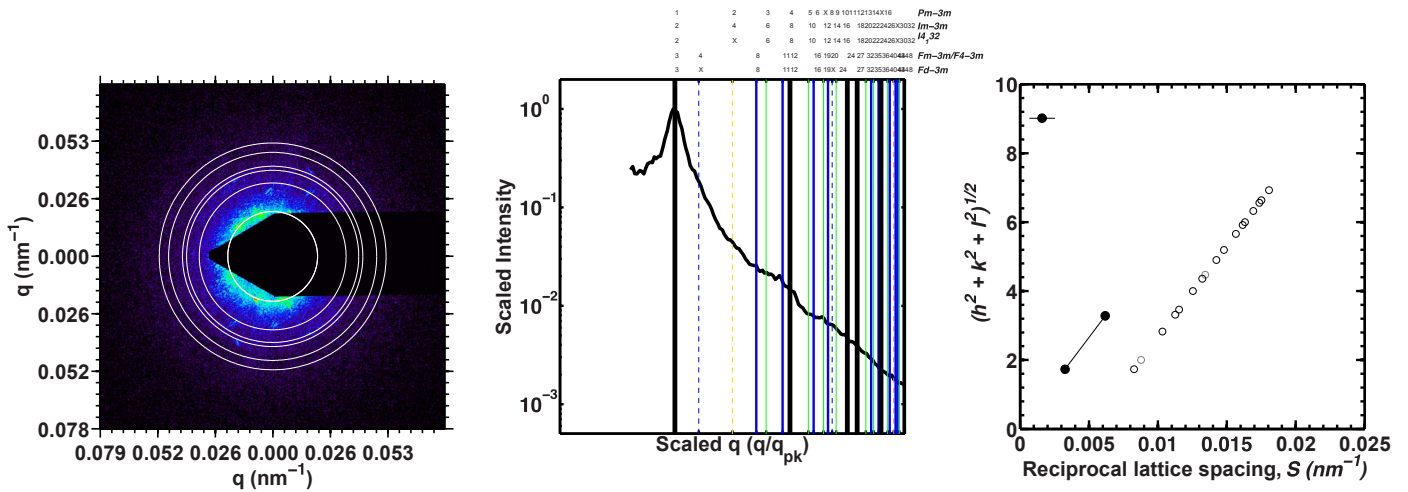

(r) *Hypera diversipunctata* extant

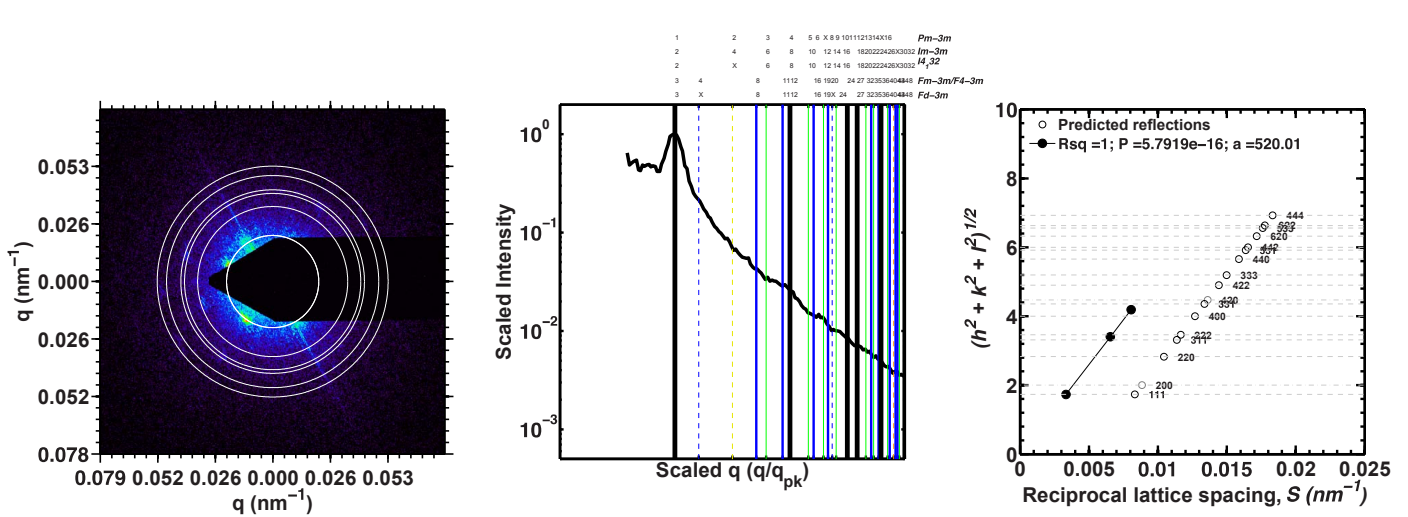



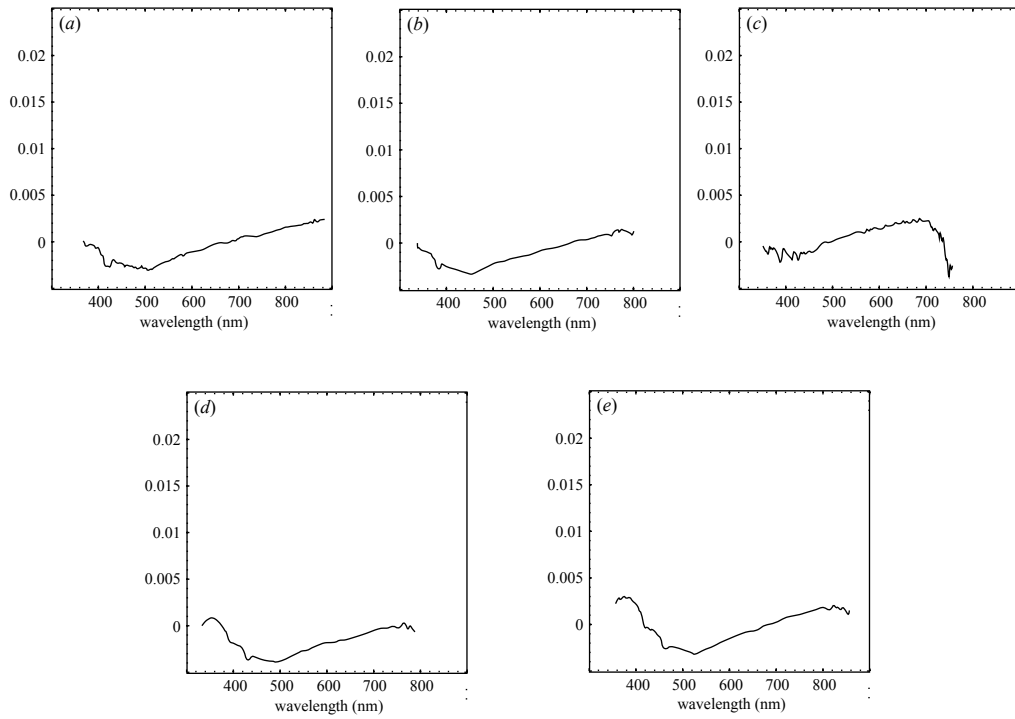

Figure S3. Reflectance spectra from a 500  $\mu\text{m}$  spot from natural sediment samples from the Blackwater estuary, Co. Cork, Ireland (*a-c*) and from Fermoy, Co. Kerry, Ireland (*d, e*).

| Taxon                                          | Taxonomy                                 | Distribution                       | Biophotonic structure          | Reference |
|------------------------------------------------|------------------------------------------|------------------------------------|--------------------------------|-----------|
| <i>Entimus imperialis</i>                      | Curculinidae: Entiminae: Entimini        | neotropical Brazil                 | diamond                        | 1,2,3     |
| <i>Eudiagogus pulcher</i>                      | Curculinidae: Entiminae: Eudiagogini     | Brazil                             | diamond                        | 4         |
| <i>Eupholus magnificus</i>                     | Curculinidae: Entiminae: Eupholini       | Papua New Guinea                   | inverse opal and quasi-ordered | 5         |
| <i>Eupholus schoenherri</i>                    | Curculinidae: Entiminae: Eupholini       | Papua New Guinea                   | diamond                        | 6         |
| <i>Platymus cultricolis</i>                    | Curculinidae: Entiminae: Naupactini      | Brazil                             | opal?                          | 7         |
| <i>Platymus mutabilis</i>                      | Curculinidae: Entiminae: Naupactini      | Brazil                             | opal?                          | 7         |
| <i>Lamprocyphus augustus</i>                   | Curculinidae: Entiminae: Naupactini      | Brazil, Argentina                  | diamond                        | 8         |
| <i>Pachyrrhynchus argus (Metapocyrtus sp.)</i> | Curculinidae: Entiminae: Pachyrrhynchini | Queensland, Australia, Philippines | opal                           | 9         |
| <i>Pachyrrhynchus congestus</i>                | Curculinidae: Entiminae: Pachyrrhynchini | Philippines                        | opal                           | 10        |
| <i>Pachyrrhynchus gemmatus</i>                 | Curculinidae: Entiminae: Pachyrrhynchini | Philippines                        | not studied (opal)             | 11        |
| <i>Pachyrrhynchus moniliferus</i>              | Curculinidae: Entiminae: Pachyrrhynchini | Philippines                        | diamond                        | 6         |
| <i>Phyllobius maculicornis, P. glaucus</i>     | Curculinidae: Entiminae: Phyllobini      | Europe                             | not studied                    | 7,12      |
| <i>Polydrusus sericeus</i>                     | Curculinidae: Entiminae: Polydrusini     | USA                                | not studied; opal              | 13        |
| <i>Anoplophora graafi</i>                      | Cerambycidae: Lamiinae: Lamiini          | Borneo, Indonesia, Malaysia        | random close packing           | 14        |
| <i>Anoplophora elegans</i>                     | Cerambycidae: Lamiinae: Lamiini          | Borneo, Indonesia, Malaysia        | opal                           | 6         |
| <i>Pseudomyagrus waterhousei</i>               | Cerambycidae: Lamiinae: Lamiini          | Malaysia, Java, Sumatra, Borneo    | opal                           | 15        |
| <i>Glenea celia</i>                            | Cerambycidae: Lamiinae: Saperdini        | Borneo, Indonesia, Malaysia        | opal                           | 6         |
| <i>Phosphorus virescens</i>                    | Cerambycidae: Lamiinae: Tragocephalini   | Nigeria                            | amorphous opal                 | 16        |
| <i>Prosopocera lactator</i>                    | Cerambycidae: Lamiinae: Prosopocerini    | Equatorial Africa                  | face centred cubic             | 17        |
| <i>Sphingnotus mirabilis</i>                   | Cerambycidae: Lamiinae: Tmesisternini    | Papua New Guinea                   | disordered sponge              | 14        |
| <i>Calothyrsa margaritifera</i>                | Cerambycidae: Lamiinae: Phrynnetini      | India, Nepal, Myanmar, Thailand    | disordered sponge              | 18        |
| <i>Sternotomis virescens</i>                   | Cerambycidae: Lamiinae: Sternotomini     | Equatorial Africa                  | not studied                    | 11        |

Table S1. Details of the taxonomy and geographic distribution of extant beetles known to possess three-dimensional biophotonic nanostructures in their scales.

| specimen      | # of scales assayed<br>(# of scales with $\geq 3$ peaks) | SAXS structural<br>correlation peak<br>$q_{pk}$ ( $\text{nm}^{-1}$ ) | peak width<br>$\Delta q$ ( $\text{nm}^{-1}$ ) | lattice parameter<br>a (nm) | bandwidth<br>( $\Delta q / q_{pk}$ ) | coherence length<br>$\xi \approx 2\pi / \Delta q$ ( $\mu\text{m}$ ) | $n_{\text{avg}}$ (chitin<br>filling fraction) |
|---------------|----------------------------------------------------------|----------------------------------------------------------------------|-----------------------------------------------|-----------------------------|--------------------------------------|---------------------------------------------------------------------|-----------------------------------------------|
| <b>fossil</b> | 8 (8)                                                    | $0.02174 \pm 0.00029$                                                | $0.00197 \pm 0.00022$                         | $500.68 \pm 6.59$           | 0.091                                | $3.22 \pm 0.38$                                                     | 1.25 (0.44)                                   |
| <b>extant</b> | 12 (9)                                                   | $0.02083 \pm 0.00057$                                                | $0.00268 \pm 0.00049$                         | $521.63 \pm 14.48$          | 0.128                                | $2.42 \pm 0.45$                                                     | 1.37 (0.65)                                   |

Table S2. Summary of the structural and optical properties of the single diamond photonic crystal in the cuticular scales of fossil and extant *Hypera diversipunctata*. Lattice parameters calculated from the slope of the plot of the moduli of assigned  $hkl$  indices of SAXS peaks versus the respective reciprocal distance  $S$  (see figure S2). Coherence length calculated from the full widths at half-maximum (FWHM) of pseudo-Voigt fits to the first-order SAXS peaks.

Supplementary references

1. Wilts B.D., Michielsen K., De Raedt H., Stavenga D.G. 2011 Hemispherical Brillouin zone imaging of a diamond-type biological photonic crystal. *J. R. Soc. Interface* **9**, 1609-1614. (DOI 10.1098/rsif.2011.0730.)
2. Deparis O. & Vigneron J.P. 2010 Modeling the photonic response of biological nanostructures using the concept of stratified medium: the case of a natural three-dimensional photonic crystal. *Mat. Sci. Eng. B* **169**, 12-15. (DOI 10.1016/j.mseb.2009.12.002.)
3. Wilts B.D., Michielsen K., Kuipers J., De Raedt H., Stavenga D.G. 2012 Brilliant camouflage: photonic crystals in the diamond weevil, *Entimus imperialis*. *J. R. Soc. Interface* **279**, 2524-2530. (DOI 10.1098/rspb.2011.2651.)
4. Jorgensen M.R. & Bartl M.H. 2011 Biotemplating routes to three-dimensional photonic crystals. *J. Mater. Chem.* **21**, 10583-10591. (DOI 10.1039/C1JM11037C.)
5. Pouya, C., Stavenga D.G., Vukusic P. 2011. Discovery of ordered and quasi-ordered photonic crystal structures in the scales of the beetle *Eupholus magnificus*. *Opt. Express* **19**, 11355-11364. (DOI 10.1364/OE.19.011355.)
6. Galusha J.W., Richey L.R., Jorgensen M.R., Gardner J.S., Bartl M.H. 2010 Study of natural photonic crystals in beetle scales and their conversion into inorganic structures via a solgel bio-templating route. *J. Mater. Chem.* **20**, 1277-1284. (DOI 10.1039/B913217A.)

7. Onslow H. 1923 On a periodic structure in many insect scales, and the cause of their iridescent colours. *Phil. Trans. R. Soc. Lond. B*, **211**, 1-74.
8. Galusha J.W., Richey L.R., Gardner J.S., Cha J.N., Bartl M.H. 2008 Discovery of a diamond-based photonic crystal structure in beetle scales. *Phys. Rev. E* **77**, 050904. (DOI 10.1103/PhysRevE.77.050904.)
9. Parker A.R., Welch V.L., Driver D., Martini N. 2003 Structural colour: opal analogue discovered in a weevil. *Nature* **426**, 786-787. (DOI 10.1038/426786a.)
10. Welch V., Lousse V., Deparis O., Parker A., Vigneron J.P. 2007 Orange reflection from a three dimensional photonic crystal in the scales of the weevil *Pachyrrhynchus congestus pavonius* (Curculionidae). *Phys. Rev. E* **75**, 041919. (DOI 10.1103/PhysRevE.75.041919.)
11. Seago A.E., Brady P., Vigneron J.-P., Schultz T.D. 2009 Gold bugs and beyond: a review of iridescence and structural colour mechanisms in beetles (Coleoptera). *J. R. Soc. Interface* **6**, S165-S184. (DOI 10.1098/rsif.2008.0354.focus.)
12. Gorb S. 2011 Insect-inspired technologies: insects as a source for biomimetics. In *Insect Biotechnology* (ed. A. Vilcinskas) pp. 241-264. Dordrecht: Springer.
13. Ghiradella H. 1984 Structure of iridescent lepidopteran scales - variations on several themes. *Ann. Entomol. Soc. Am.* **77**, 637-645.
14. Dong B.Q., Zhan T.R., Liu X.H., Jiang L.P., Liu F., Hu X.H., Zi J. 2011 Optical response of a disordered bicontinuous macroporous structure in the longhorn beetle *Sphingnotus mirabilis*. *Phys. Rev. E* **84**, 011915. (DOI 10.1103/PhysRevE.84.011915.)



15. Simonis P & Vigneron J.P. 2011 Structural color produced by a three-dimensional photonic polycrystal in the scales of a longhorn beetles: *Pseudomyagrus waterhousei* (Coleoptera: Cerambycidae). *Phys. Rev. E*. 2011 **83**, 011908. (DOI 10.1103/PhysRevE.83.011908.)
16. Van Hooijdonk E., Barthou C., Vigneron J.P., Berthier S. 2013 Yellow structurally modified fluorescence in the longhorn beetles *Celosterna pollinosa sulfurea* and *Phosphorus virescens* (Cerambycidae). *J. Luminescence* **136**, 313-321. (DOI 10.1016/j.jlumin.2012.12.022.)
17. Colomer J.-F., Simonis P., Bay A., Cloetens P., Suhonen H., Rassart M., Vandembem C., Vigneron J.P. 2012 Photonic polycrystal in the greenish-white scales of the African longhorn beetle *Prosopocera lactator* (Cerambycidae). *Phys. Rev. E* **85**, 011907. (DOI 10.1103/PhysRevE.85.011907.)
18. Lafait, J., Andraud, C., Berthier, S., Boulenguez, J., Callet, P., Dumazetb, S., Rassart, M. and Vigneron, J.-P. 2010 Modeling the vivid white color of the beetle *Calothyrsa margaritifera*. *Mat. Sci. Eng. B* **169**, 16-22. (DOI 10.1016/j.mseb.2009.12.026.)
